## METHODS

## MFPSP: Identification of fungal species-specific phosphorylation site using offspring competition-based genetic algorithm

Chao Wang<sup>1\*</sup>, Quan Zou<sup>2\*</sup>

**1** Center for Genomic and Personalized Medicine, Guangxi Key Laboratory for Genomic and Personalized Medicine, Guangxi Collaborative Innovation Center for Genomic and Personalized Medicine, Guangxi Medical University, Nanning, Guangxi, China, **2** Institute of Fundamental and Frontier Sciences, University of Electronic Science and Technology of China, Chengdu, China

\* [siraowang@foxmail.com](mailto:siraowang@foxmail.com) (CW); [zouquan@nclab.net](mailto:zouquan@nclab.net) (QZ)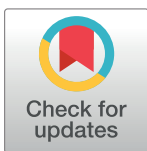

## Abstract

Protein phosphorylation is essential in various signal transduction and cellular processes. To date, most tools are designed for model organisms, but only a handful of methods are suitable for predicting task in fungal species, and their performance still leaves much to be desired. In this study, a novel tool called MFPSP is developed for phosphorylation site prediction in multi-fungal species. The amino acids sequence features were derived from physicochemical and distributed information, and an offspring competition-based genetic algorithm was applied for choosing the most effective feature subset. The comparison results shown that MFPSP achieves a more advanced and balanced performance to several state-of-the-art available toolkits. Feature contribution and interaction exploration indicating the proposed model is efficient in uncovering concealed patterns within sequence. We anticipate MFPSP to serve as a valuable bioinformatics tool and benefiting practical experiments by pre-screening potential phosphorylation sites and enhancing our functional understanding of phosphorylation modifications in fungi. The source code and datasets are accessible at <https://github.com/AI4HKB/MFPSP/>.

## OPEN ACCESS

**Citation:** Wang C, Zou Q (2024) MFPSP: Identification of fungal species-specific phosphorylation site using offspring competition-based genetic algorithm. *PLoS Comput Biol* 20(11): e1012607. <https://doi.org/10.1371/journal.pcbi.1012607>

**Editor:** Jordan Douglas, University of Auckland, NEW ZEALAND

**Received:** July 26, 2024

**Accepted:** November 3, 2024

**Published:** November 18, 2024

**Copyright:** © 2024 Wang, Zou. This is an open access article distributed under the terms of the [Creative Commons Attribution License](https://creativecommons.org/licenses/by/4.0/), which permits unrestricted use, distribution, and reproduction in any medium, provided the original author and source are credited.

**Data Availability Statement:** The source code and datasets are accessible at <https://github.com/AI4HKB/MFPSP/>.

**Funding:** This work was supported by the National Natural Science Foundation of China (<https://www.nsf.gov.cn/>) under Grants Nos. 62272065 (to C.W.) and 62002051 (to C.W.), and Guangxi Natural Science Foundation (<http://kjt.gxzf.gov.cn/>) under Grants No. 2024GXNSFBA010372 (to C.W.) The funders did not play any role in the study design,

## Author summary

Post-translational modifications (PTMs) is one of the key determinant factors of protein's activity, stability, localization and folding. With the explosive growth of proteomics data, pre-screening of amino acid that with high potential to be phosphorylated is urgently needed before proceeding of wet experiment for the purpose of mechanism and function investigation. Although great progresses have been achieved in PTMs prediction, research on fungi has long been overlooked as algorithms suitable for fungal species PTMs identification are severely lacking. To fill this research gap, we developed a species-specific PTMs identification method, called MFPSP, for eight fungal species. In order to extract informative features, multiple sequence information was generated. The features were optimized by performing a global search strategy to avoid the local optima that traditional feature

data collection and analysis, decision to publish, or preparation of the manuscript.

**Competing interests:** The authors have declared that no competing interests exist.

selection methods may encounter. Moreover, the effectiveness of MFPSP was proved by comparison with current excellent algorithms. It is expected our proposed model can effectively predict the PTMs of fungus and provide reliable candidates for further biological experiments.

## 1 Introduction

Phosphorylation, primarily occurs on serine (S), threonine (T) and tyrosine (Y) amino acid residues, is one of the most critical post-translational modifications (PTMs) that increase proteomic diversity through the regulation of protein activity, interactions and localization [1,2]. It has been reported that more than 30% of the mammalian proteins can be phosphorylated [3], and this ratio is updated to 75% in yeast and human proteomes [2,4]. The protein phosphorylation or dephosphorylation directly influences the signal transduction and various cellular behaviors, such as apoptosis, cell division, differentiation, and immune response [5]. Take fungus as an example, the biosynthesis of aflatoxins biosynthesis which causes food contamination word wide in *Aspergillus flavus* (*A. flavus*) is mediated by Fus3-MAP kinase phosphorylation module [6], titan cell formation and virulence in the fungal pathogen *Cryptococcus neoformans* (*C. neoformans*) is regulated by the phosphorylation of protein Gpa1 [7], FgSfl1 phosphorylation, in *Fusarium graminearum* (*F. graminearum*), is important for conidiation, sexual reproduction, and pathogenesis [8].

As the phosphorylation occurs on specific residual level, for a given protein, very few of the three residues can be phosphorylated, which implies efficient identification of the amino acid with high potential to be phosphorylated in a protein is essential, especially for further investigating its functional roles in cell biology and diseases as mentioned above. Although traditional wet experiment-based methods, such as radioactive labeling [9], LC-MS [10], and ChIP [11] had contributed greatly for this purpose, they are incompetent in the post-genomic era with exponentially growing data because of their time-consuming, laborious, and costly procedures [12]. Alternately, machine learning-based approaches [13,14], with advantages of high throughput, fast speed and low costing, are boosting for eliminating aforementioned experimental obstacles in PTMs identification [15].

Although innumerable tools have been developed for PTMs identification, most of them are designed for model organisms, especially for mammals, crops and industrial bacteria. Only a handful of reported methods are suitable for the prediction task of fungal species [16], and the performance achieved by existing in silico models still leaves much to be desired, which largely impedes the function investigation of PTMs in fungal proteins.

Here, we developed a novel tool, MFPSP, for phosphorylation site prediction in multi fungal species. Sequence characteristics were described by physicochemical features and distributed information, and an offspring competition-based genetic algorithm was applied for selecting the optimal feature subset. Finally, site specific model for seven fungal species were established independently. Independent testing demonstrated that our proposed model achieves a more advanced and balanced performance as compared to several state-of-the-art available toolkits.

**Fig 1** illustrates the workflow of constructing the MFPSP model, which includes three main steps as described below.

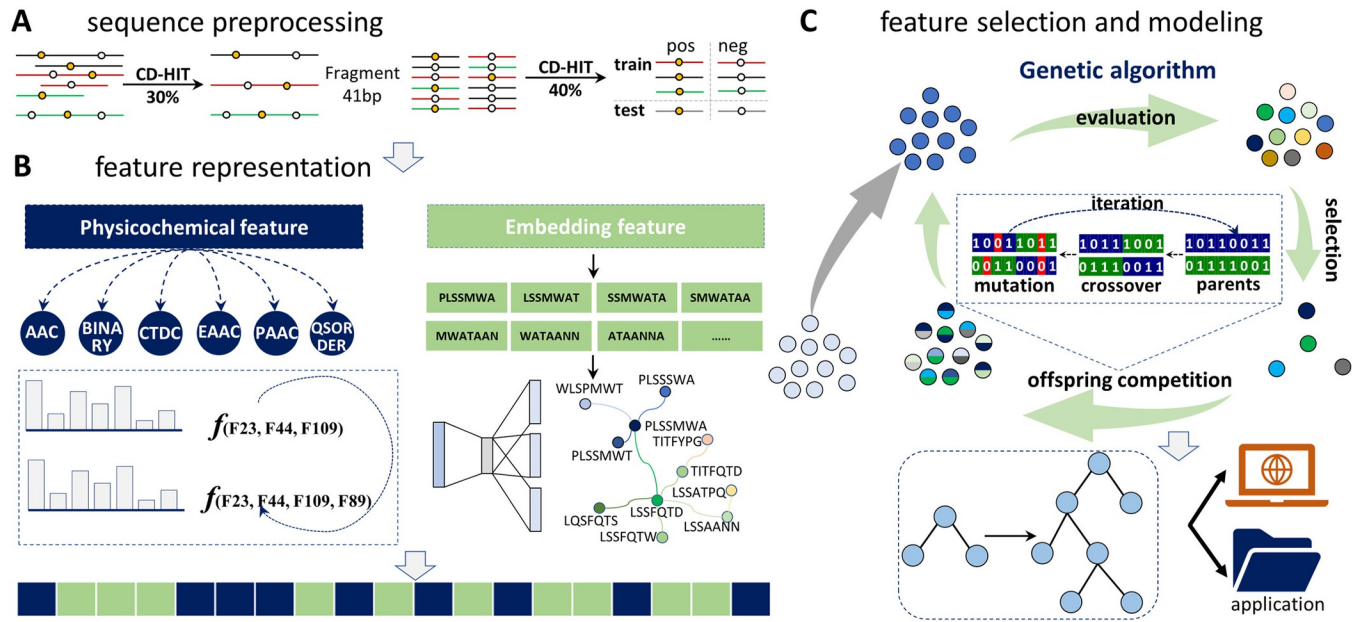

**Fig 1. MFPSP workflow.** A: sequence collection and redundancy reducing. B: feature representation by physicochemical and embedding methods. C: feature selection based on genetic algorithm with offspring competition and model construction.

<https://doi.org/10.1371/journal.pcbi.1012607.g001>

## 2 Materials and methods

### 2.1 Data extraction and preprocessing

The fungi phosphorylation information of eight fungal species was retrieved from the Fungi Phosphorylation Database (FPD) [17]. Overall, 11222 proteins containing 62272 non-redundant phosphorylation sites were collected by FPD, the eight species are *A. flavus*, *Aspergillus nidulans* (*A. nidulans*), *C. neoformans*, *F. graminearum*, *Magnaporthe oryzae* (*M. oryzae*), *Neurospora crassa* (*N. crassa*), *Saccharomyces cerevisiae* (*S. cerevisiae*) and *Schizosaccharomyces pombe* (*S. pombe*). The number of proteins and phosphorylation S/T/Y sites for each species are listed in Table 1.

A strict redundancy reducing procedure was applied for proteins and peptide fragments, which is detailed in [18]. In brief, protein redundancy was eliminated to a threshold of 0.3, then 41 bp length of peptide fragments were extracted with S/T/Y in the center [19,20]. At last, the redundancy of extracted fragments was further reduced to a threshold of 0.4. To construct a balanced dataset, the negative samples were randomly sampled to same number of the positive. Finally, 80% samples in above the balanced dataset were used for training, the remaining 20% were used for testing.

### 2.2 Feature representation

Representing the protein fragment into discriminative feature is crucial for reliable and superior model. In this work, two types of feature-encoding algorithm were applied to enrich the fragment information.

#### Sequence physicochemical-based features

Five feature descriptors aiming to formulate the physicochemical property of protein fragment were employed for all species. These features are amino acid composition (AAC), C/T/D-

**Table 1. The statistics of number of proteins and phosphorylation S/T/Y sites for different organisms.**

| Species                  | Site type | Proteins | Proteins (sim 0.3) # | Fragments (pos/neg) | Fragments (sim 0.4) (pos/neg) |
|--------------------------|-----------|----------|----------------------|---------------------|-------------------------------|
| <i>Aspergillus sp.</i> * | S         | 794      | 619                  | 1086/44199          | 673/10647                     |
|                          | T         | 301      | 239                  | 310/11587           | 235/3922                      |
|                          | Y         | 41       | 36                   | 36/638              | —                             |
| <i>C. neoformans</i>     | S         | 613      | 601                  | 1214/42669          | 636/9586                      |
|                          | T         | 186      | 179                  | 249/7529            | 166/2649                      |
|                          | Y         | 20       | 19                   | 20/256              | —                             |
| <i>F. graminearum</i>    | S         | 1343     | 1322                 | 2874/83705          | 1838/20178                    |
|                          | T         | 576      | 569                  | 766/25889           | 603/8702                      |
|                          | Y         | 67       | 67                   | 71/1300             | —                             |
| <i>M. oryzae</i>         | S         | 1415     | 1383                 | 3759/86208          | 1872/20943                    |
|                          | T         | 601      | 405                  | 680/17844           | 447/6261                      |
|                          | Y         | 23       | 21                   | 23/49               | —                             |
| <i>N. crassa</i>         | S         | 1529     | 1516                 | 3614/106281         | 2369/24519                    |
|                          | T         | 812      | 805                  | 1288/39062          | 992/12656                     |
|                          | Y         | 137      | 136                  | 151/2852            | —                             |
| <i>S. cerevisiae</i>     | S         | 3880     | 3323                 | 25495/151792        | 9535/38748                    |
|                          | T         | 2789     | 2440                 | 8563/79890          | 4937/27925                    |
|                          | Y         | 1284     | 1193                 | 1815/24888          | 1365/11899                    |
| <i>S. pombe</i>          | S         | 1316     | 1225                 | 3049/73498          | 1781/16254                    |
|                          | T         | 409      | 386                  | 567/13718           | 434/4916                      |
|                          | Y         | 82       | 75                   | 81/1595             | —                             |

\* *A. flavus*+*A. nidulans*

# sim: sequence similarity

<https://doi.org/10.1371/journal.pcbi.1012607.t001>

composition (CTDC), enhanced amino acid composition (EAAC), pseudo-amino acid composition (PAAC), quasi-sequence-order (QSOrder). In addition, the BINARY method was selectively used since which showed better performance in larger dataset. They are described in detail in the [S1 Methods](#).

## Embedding-based features

Recently, embedding algorithms, e.g., FastText, Glove and Word2vec, have been widely used for distributed representation of all kinds of biological sequence for the downstream task of classification [21–24], clustering [25,26], gene-disease or protein-protein interaction [27,28], and so on [29]. In the framework of FastText, embedded feature for each word in a vocabulary is shaped by its context information, where similar words are close in spatial distribution, and each word was represented as a predefined n-dimensional numeric vector [30]. The process for protein fragment with N amino acid residues embedding is briefly described as follows. The protein fragment was first transferred into a bio-sentence in an overlapping manner by sliding k ( $k < N$ ) length window along the sequence with a stride length of 1, each generated k-mer was regard as a word in this bio-sentence. Then, the FastText was applied to embedding each word into a fixed 20-dimensional numeric vector by adopting the skip-gram model in this work. Each fragment feature was represented by sequentially concatenating feature of each word in the sequence, which is a vector of size  $(N-k+1) \times 20$ . The Gensim library (v4.2, <https://radimrehurek.com/gensim/>) was employed to implemented the FastText framework.

### 2.3 Feature selection based on genetic algorithm with offspring competition

Constructing machine learning model directly on the above physicochemical-based features and embedded features may result sub-optimal performance in view of the information redundancy. Hence, in this study, genetic algorithm [31] was applied to screen out the optimal feature subset from the combined features. The major framework of genetic algorithm was reported in our early works [32], the offspring selection process was improved by a competition strategy to advance algorithm's efficiency. The process is briefly described as follows. First, a constant number of populations (feature subsets) were randomly generated from the original features and each of the subset, i.e., the chromosome in genetic algorithm, is constrained to 100D. Then, the feature subsets were evaluated by a specified fitness function, subsets that showed a better performance were selected as the parents to generate new populations (offspring) by three genetic operators, selection, crossover, and mutation.

The selection process was optimized by offspring competition strategy. The fitness value was sorted by a descending order and the first third of top feature subsets were chosen for offspring competition. For each pair of parents, a two-point crossover method was used to generate offspring, followed by a random mutation with probability of 0.0003. To avoid prematurity, the crossover procedure operated 10 times and the number of mutation times increased once every five generations. As only a third of the populations were selected for the offspring competition, the selection step implemented three times to generate a same population. Two global parameters, the number of population and generation was set to 60 and 150, respectively.

### 2.4 Model training and evaluation

Five metrics were used to comprehensively measure the performance of the ensemble model: ACC, specificity (SP), sensitivity (SN), Matthews correlation coefficient (MCC), and AUC. They were calculated as follows:

$$\text{ACC} = \frac{TP + TN}{TP + TN + FP + FN} \quad (1)$$

$$\text{SN} = \frac{TP}{TP + FN} \quad (2)$$

$$\text{SP} = \frac{TN}{TN + FP} \quad (3)$$

$$\text{MCC} = \frac{TP \times TN - FP \times FN}{\sqrt{(FP + TP)(FN + TP)(FP + TN)(FN + TN)}} \quad (4)$$

The metric AUC calculates the area under the receiver operating characteristic curve based on the false-positive rate (FPR) and the true positive rate (TPR) under various thresholds. The TPR and the FPR were calculated as follows:

$$\text{TPR} = \frac{TP}{TP + FN} \quad (5)$$

$$\text{FPR} = \frac{FP}{TN + FP} \quad (6)$$

where TP = true positive, FP = false-positive, TN = true negative, and FN = false negative. SN and SP were employed to evaluate the model performance with respect to the positive and negative samples, respectively. The remaining three metrics are global prediction performance indicators.

### 3 Results and discussion

#### 3.1 Descriptor parameter optimization and feature selection

Eight fungal species are included in this study, and the feature optimization and model building process are similar. In order to make the description concise and explicit, the serine phosphorylation of *S. cerevisiae* was taken as an example (except where noted) in the following context. Five physicochemical descriptors were applied for sequence physicochemical property representation, and three of them, i.e., Qsorder, EAAC, and PAAC, were conducted for parameter optimization to make each of them as informative as possible. The parameter search range, evaluation metrics and the optimal value are listed in [S1 Methods](#) and [S1 Table](#).

Based on the optimal parameters determined above, sequences were numerically formulated by the five feature algorithms. Considering the high feature dimension generated by of EAAC and BINARY descriptor, the top 250 most importance features calculated by light gradient boosting machine (LGB) method of the two methods were roughly selected for feature combination. Finally, a feature subset with dimensionality of 623 were generated. Of note, 373D features were generated for several species where the BINARY descriptor was not used as mentioned in materials and methods.

For serine phosphorylation of *S. cerevisiae*, the 623D features were further optimized by sequential forward search (SFS) method as elaborated in [33]. Four different feature importance list calculated by F-score, LGB, MRMD [34] and random forest (RF), respectively, were subjected to SFS feature selection based on SVM algorithm ([S1 Methods](#) and [S2 Table](#)). The comparative results were showed in [Fig 2](#). Generally, values of the five metrics increase rapidly in the top 100 important features, and then tend to be flat with more features added to the model. In terms of the four types of feature importance ranking methods, the LGB-based method resulted the best performance when evaluated by metric ACC, SP, MCC and AUC, the MRMD-based methods exhibited lowest efficiency ([Fig 2A–2E](#)). The optimal feature subset was obtained based on the AUC value, which resulted in a feature subset of 221D with AUC of 0.8342. As depicted in [Fig 1F](#), the LGB-based method filtered out approximately 65% of the original 623D features, which also the most effective among the four methods. Collectively, our results indicated that the original combined features were serve redundancy, the LGB-based SFS feature optimization strategy is superior than others and adopted for the final optimal feature selection.

#### 3.2 Distributed representation of nucleic acids fragments

To further enrich the sequence information, the word embedding algorithms were employed to mining the semantic information. Each k-mer in the corpus was embedded into vector with 20D, and the sequence feature vector was generated by sequentially concatenating feature of each word in the sequence. Two critical parameters of FastText, the k-mer length K (from 2 to 10) and window size W (from 1 to 10), were optimized by a grid search method ([S1 Methods](#) and [S4 Table](#)). As depicted in [Fig 3](#), the value of K exhibited a more decisive impact on the ACC. Models that with small K and W are more in favour when their ACC values showed no significant difference. Taken together, k-mer length of 7 and a window size of 1 were adopted for the final embedding model of *S. cerevisiae* S site ([Fig 3A](#)). Based on the optimal K and W, 700D features were generated, then a same SFS procedure was applied to this embedding

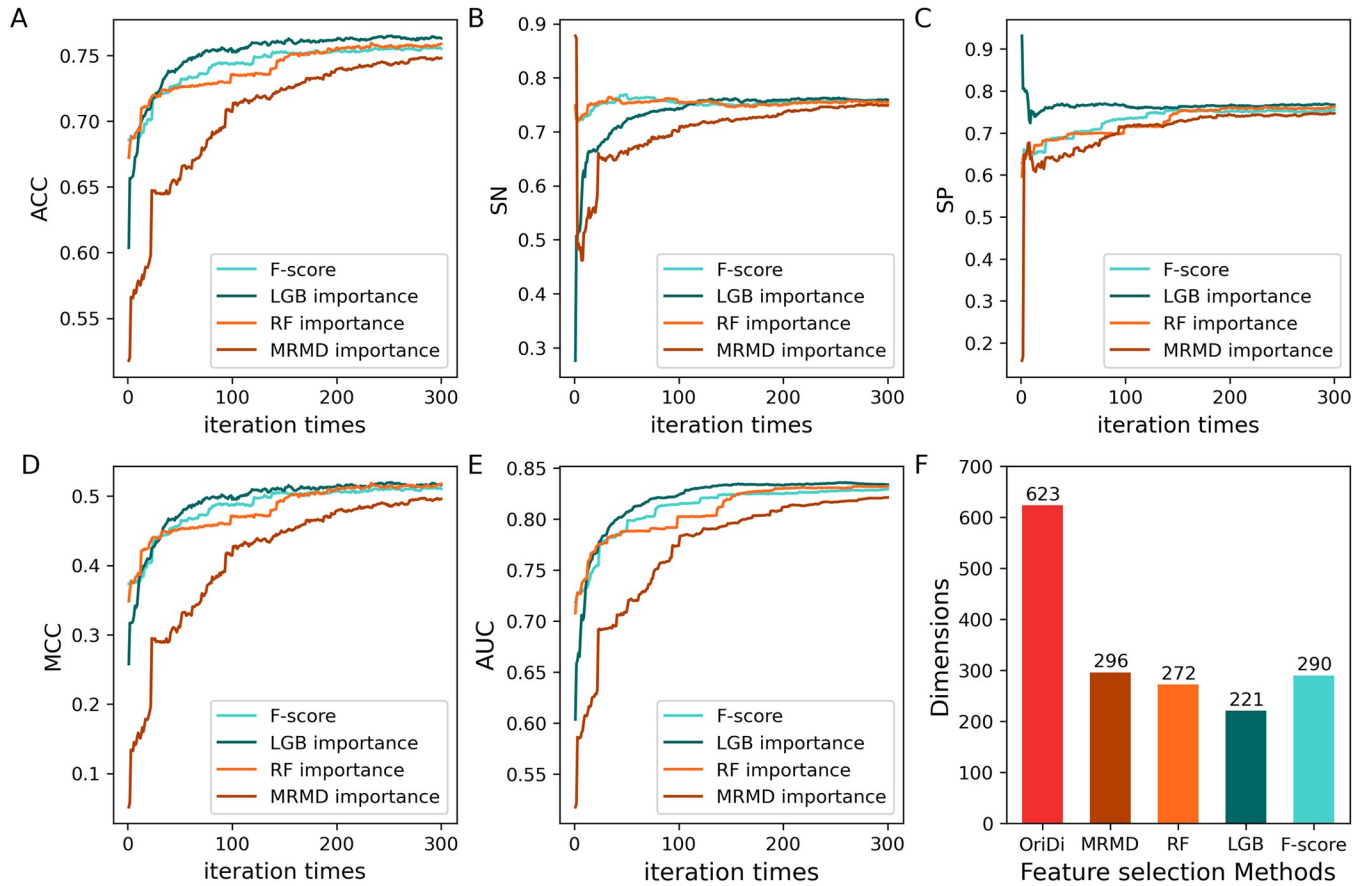

**Fig 2. Comparison results of four feature selection strategies for *S. cerevisiae* S phosphorylation site.** OriDi: original feature dimension.

<https://doi.org/10.1371/journal.pcbi.1012607.g002>

vector and, finally, 278D were remained. For *S. cerevisiae* T (K = 7 and W = 1) and Y site (K = 9 and W = 1) (Fig 3B–3C), there were 292D and 172D features retained, respectively after SFS optimization.

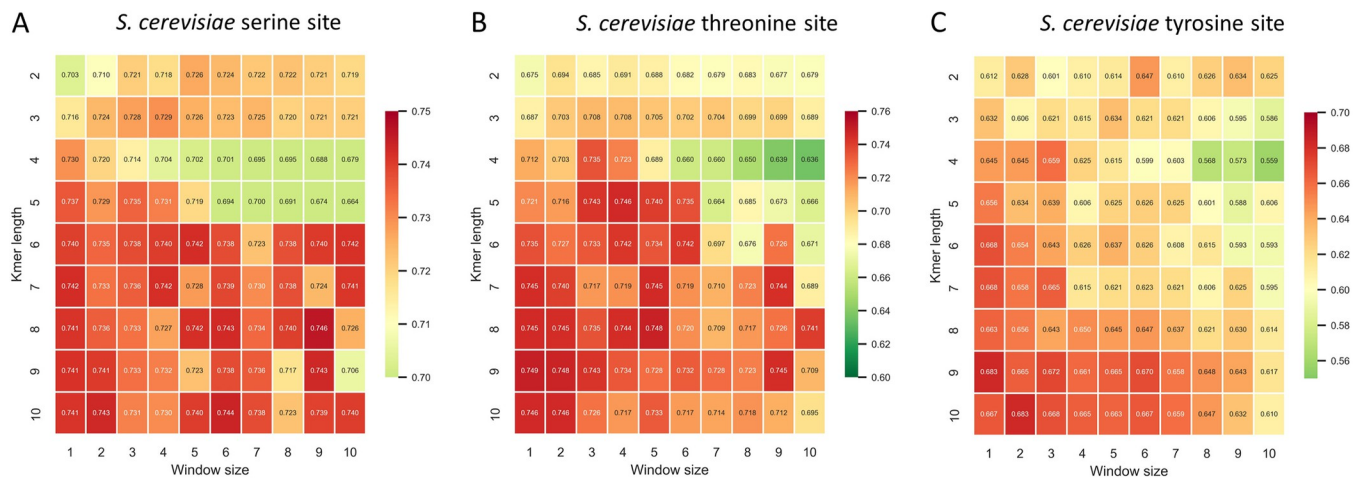

**Fig 3. Accuracy values of the model constructed with embedded features with different k-mer length and window size.**

<https://doi.org/10.1371/journal.pcbi.1012607.g003>

### 3.3 Feature redundancy eliminating based on genetic algorithm with offspring competition strategy

As stated above, for *S. cerevisiae* S site, the physicochemical feature (623D) and the embedded feature (700D) were reduced to 221D and 278D, respectively using the SFS method based on LGB feature importance. During this feature optimization process, feature was added one by one to training prediction model. However, this approach somewhat neglected the comprehensive consideration of feature combinations and global-level optimization, Hence, we embarked on eliminating redundant features more rigorously.

In the present study, the genetic algorithm was employed to screen out the optimal feature combination from the combined 499D features (S1 Methods), the framework of the genetic algorithm is detailed in [32]. To avoid premature convergence phenomena, the algorithm's selection operator was optimized by an offspring competition strategy (see [material and methods](#)). Of note, the generation of genetic algorithm was set to 150, and, for comparative purpose, the top 2 most effective feature selection strategies i.e., LGB and F-score based methods, exhibited in Fig 2, were chosen to reduce the feature dimensionality.

As shown in Fig 4 for *S. cerevisiae* S site, the feature dimension of the genetic algorithm is fixed to 100 as the demand of algorithm framework, while that of LGB and F-score based method is linearly increased with iteration times. Apparently, the genetic algorithm significantly outperformed the comparison methods in all evaluation metrics (Fig 4A–4E). Overall,

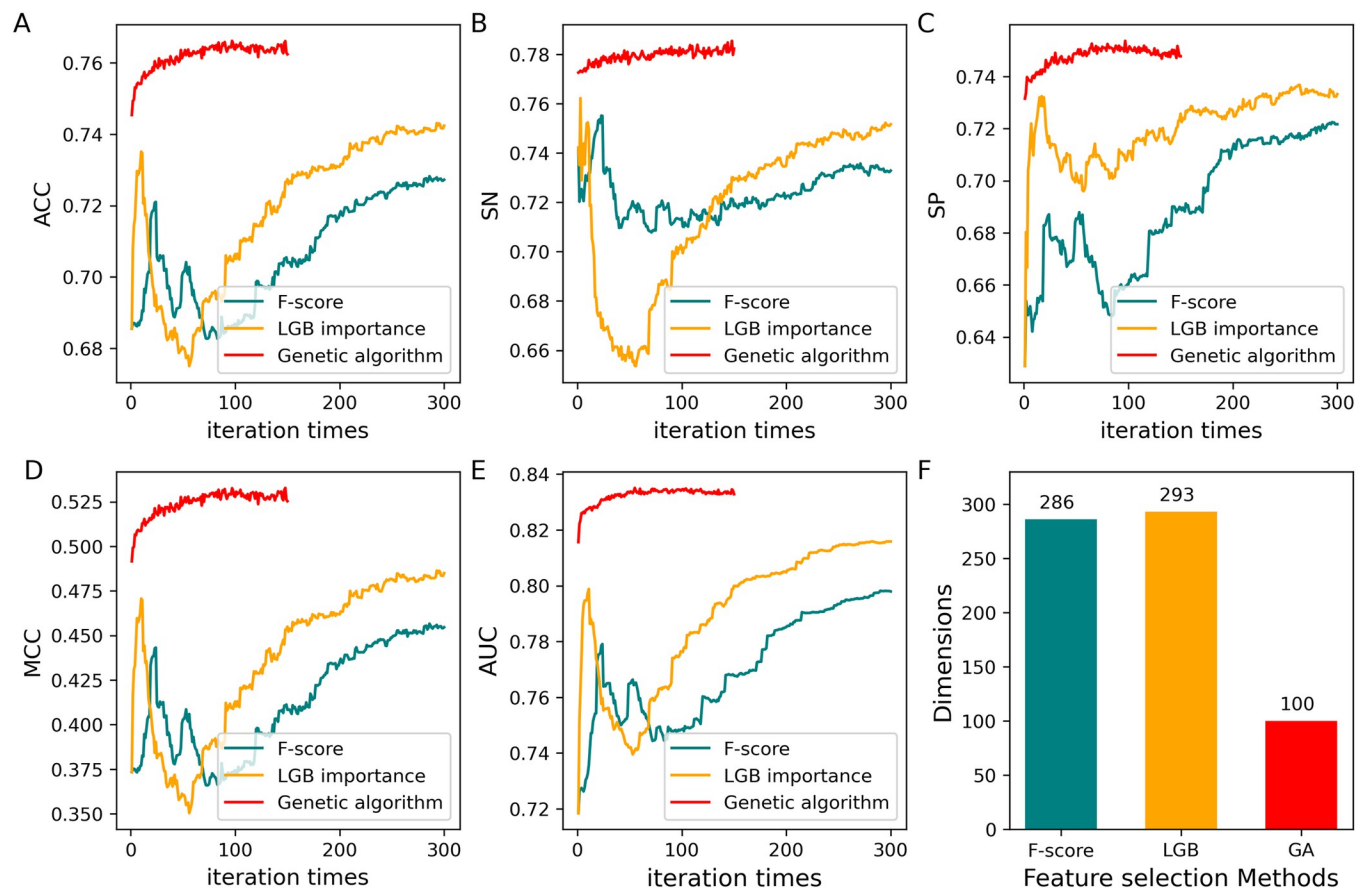

**Fig 4. Performance comparison of feature selection strategies for *S. cerevisiae* S phosphorylation site.**

<https://doi.org/10.1371/journal.pcbi.1012607.g004>

Table 2. The prediction performance for the fungi phosphorylation S/T/Y site in seven organisms.

| Residual type | Fungal species         | ACC    | SN     | SP     | MCC    | AUC    |
|---------------|------------------------|--------|--------|--------|--------|--------|
| S             | <i>Aspergillus sp.</i> | 0.8159 | 0.8131 | 0.8187 | 0.6324 | 0.8725 |
|               | <i>C. neoformans</i>   | 0.8402 | 0.8373 | 0.8431 | 0.6816 | 0.9014 |
|               | <i>F. graminearum</i>  | 0.8298 | 0.8329 | 0.8268 | 0.6602 | 0.8910 |
|               | <i>M. oryzae</i>       | 0.8495 | 0.8518 | 0.8471 | 0.6990 | 0.9060 |
|               | <i>N. crassa</i>       | 0.8681 | 0.8839 | 0.8522 | 0.7368 | 0.9365 |
|               | <i>S. cerevisiae</i>   | 0.7613 | 0.7775 | 0.7452 | 0.5231 | 0.8335 |
|               | <i>S. pombe</i>        | 0.8214 | 0.8056 | 0.8372 | 0.6435 | 0.8955 |
| T             | <i>F. graminearum</i>  | 0.8033 | 0.7888 | 0.8179 | 0.6083 | 0.8668 |
|               | <i>M. oryzae</i>       | 0.8179 | 0.8317 | 0.8040 | 0.6366 | 0.8701 |
|               | <i>N. crassa</i>       | 0.8398 | 0.8663 | 0.8133 | 0.6811 | 0.9156 |
|               | <i>S. cerevisiae</i>   | 0.7532 | 0.7608 | 0.7456 | 0.5066 | 0.8199 |
|               | <i>S. pombe</i>        | 0.8175 | 0.8017 | 0.8330 | 0.6377 | 0.8797 |
| Y             | <i>S. cerevisiae</i>   | 0.7202 | 0.7005 | 0.7399 | 0.4412 | 0.7789 |

<https://doi.org/10.1371/journal.pcbi.1012607.t002>

in light of metrics and dimension (Fig 4F), it can be stated that the offspring competition-based genetic algorithm is superior than others in feature optimization. The detailed metrics for each of the final optimal model are listed in Table 2.

### 3.4 Feature intersection, contribution and pattern analysis

To look deeper into features that shared among different species, we processed the comparison in five models that adopted the same K and W parameters for distributed representation of S phosphorylation site. As depicted in S1 Fig, nearly 40% of the total 100 features are shared by at least one other model. For example, 38 features of *S. cerevisiae* were presented in other 4 species, where ten of them were identical with *S. pombe* and *F. graminearum*, 6 of them were identical with *M. oryzae*.

We then specially focused on the top 20 most important features inferred by SHAP [35–37]. The feature intersection and sequence patterns were exhibited in Fig 5. There are seven features shared by at least two species, SW.17.S (EAAC) is the only one that identified in all species. Based on the calculation formula [38], for a 41bp amino acid fragment, SW.17.S (EAAC) refers to the S composition in 17th sliding 5-mer window, namely 17 to 21 bp in the fragments, which was in line with the amino acid enrich and deplete biases pattern as shown in Fig 5B, similar pattern was also observed for feature SW.12.S(EAAC) which presented in three species. BINARY.F342 refers to composition of arginine (R) at the 18th position in the 41bp fragments, significant amino acid biases can be seen at this position in all five species (Fig 5B). Another obvious amino acid enrich pattern, corresponding to BINARY.F435, was the Proline (P) at 22th position in the fragments. The latter two features generated by BINARY descriptor were kept in four of the five species, suggesting the discriminative ability of features relation to sequence composition patterns. Charge.G1(CTDC) and hydrophobicity\_CASG920101.G1(CTDC) refers to charge (K and R) and polar (“KDEQPSRNTG”) properties, respectively (Fig 5C). EmbedFea282 corresponds to the embedded feature of the fifteenth 7-length k-mer, namely 15 to 21bp in the fragments, which partially explains the enrichment of various feature patterns in this region as mentioned above. Overall, these results indicated that each type feature contributed uniquely to the augmentation of sequence information, and our feature optimization strategy is competent to mining and retain the informative characteristic in sequence.

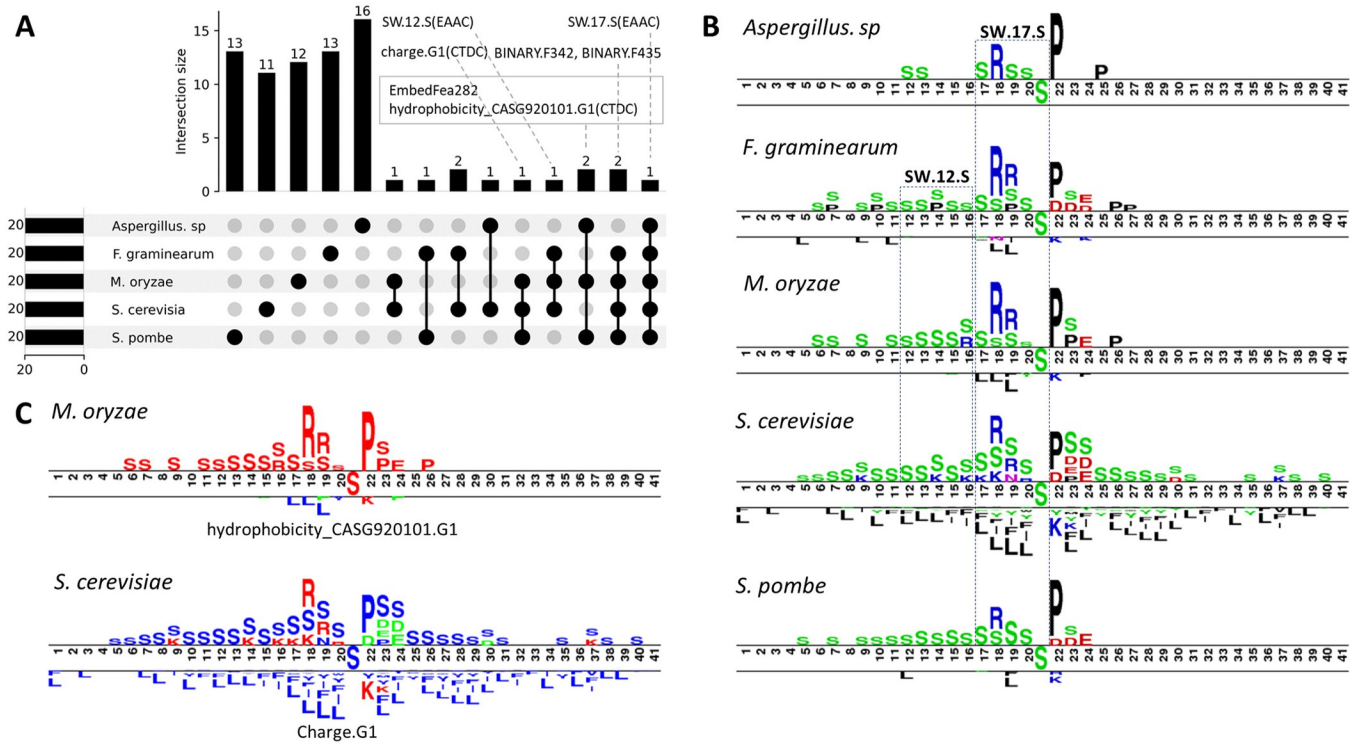

**Fig 5. Feature intersection and sequence patterns for *S. cerevisiae* S site of five fungal species.** The enrichment and depletion bias of amino acid was calculated by Two-Sample-Logos (<http://www.twosamplelogo.org/>).

<https://doi.org/10.1371/journal.pcbi.1012607.g005>

A further exploration of contribution of features have on the mode’s performance was processed based on SHAP. For feature importance, hydrophobicity\_PONP930101.G3(CTDC) contributed most to the S phosphorylation, followed by SW.17.S(EAAC) and BINARY.F435. Seven of the top 20 most important features were generated by embedding method, suggesting the excellent efficiency of this feature representation strategy (Fig 6A). The decisive trend for each feature value were showed in Fig 6B, where higher value for 11 features presented a positive impact on model behavior, the remaining nine features showed contrary impacts. For example, a lower value of hydrophobicity\_PONP930101.G3(CTDC) is associated with positive impact on S phosphorylation identification, while lower of this value exhibited opposite effect. It is worthy of note that the top share features and patterns, such as SW.17.S, SW.12.S (Fig 5), are also the contributed most for model performance (Fig 6B).

Moreover, we tried to further explore the possible mechanisms of how these features correlate with biological functions. Our results showed that the R and S site (SW17.S) was significantly enriched near left of S phosphorylation site, indicating that the intrinsic disorder of protein, promoted by R, K, E, P and S sites, are crucial for the phosphorylation [39]. It was reported that phosphorylation on hydrophobic motif creates a specific docking site that recruits and activates phosphoinositide-dependent kinase-1, which then activates the downstream actions [40]. Residual charge, such as Charge.G1, is also an important factor for phosphorylation, all-atom molecular dynamics simulations demonstrated that distribution positively charged residues throughout the protein sequence has great impact on salt bridge formation, which influences the effect of phosphorylation [41].

Finally, deeper insight into interaction effect, calculated by SHAP dependence plot, of the top 20 features were presented in Figs 6C–6H and S2. Feature turning point, complement to

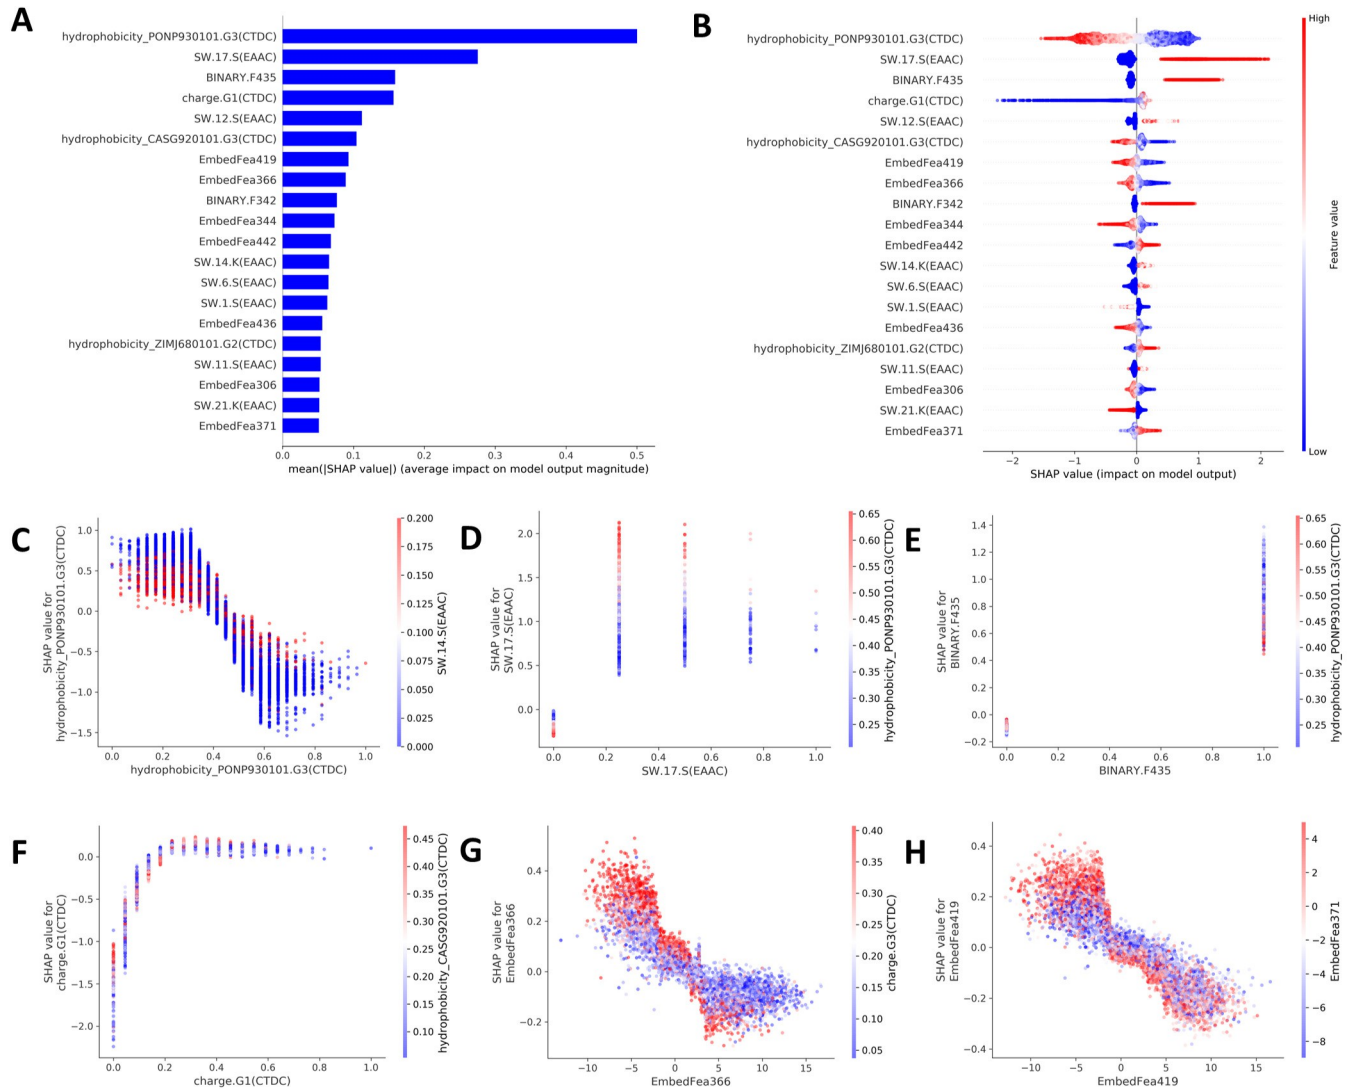

**Fig 6. Feature importance, contribution and dependency analysis.** A: the 20 most important features. B: summary plot for feature value contribution. The x-axis represents the SHAP values, representing the impact that feature had on the model's performance. C–H: SHAP dependence plots. These plots show the effect that a single feature has on the model and the interaction effects across features.

<https://doi.org/10.1371/journal.pcbi.1012607.g006>

Fig 6B, can be visualized. For example, the turning value for feature hydrophobicity\_PONP930101.G3(CTDC) is approximately 0.4, feature value higher than that threshold weakened model behavior, for while value lower than that resulted in contrary effect (Fig 6C). Charge.G1(CTDC) exhibited an opposite trend, where the turn point is approximately 0.2, and values higher than that change SHAP values from negative to positive (Fig 6F). Excepting their independent contribution, interplay between features are widely exist. Interaction between low EmbedFear366 values (range-10 to 2.5) and high Charge.G3 (CTDC) values (range 0.2 to 0.4) exhibited a prompt impact on model behavior (SHAP values>0), but the latter showed little impact when EmbedFear366 values beyond 2.5 (Fig 6G). A high feature value of SW.17.S (0.0 to 1.0) were positively correlated with the value of hydrophobicity\_PONP930101.G3(CTDC) (Fig 6D), while the later showed a negative interaction with BINARY.435 (Fig 6E). More feature interaction patterns can be seen in Fig 6C–6H and S2.

### 3.5 Comparison with existing predictors

Considering the representativeness and availability, four methods were selected for the comparison, including the general model NetPhos (v 3.1) [42], yeast-serine and threonine specific model NetPhosYeast [43], plant-specific tool PHOSER [44] and ScerePhoSite [18] that designed for *S. cerevisiae* (see more detail in S5 Table).

Model performance evaluation and comparison were processed on the independent testing sets. The detailed comparative results were presented in Table 3. Our proposed model MFPSP, on the whole, achieved the best metrics on ACC, SN, MCC and AUC in nearly all fungi species and phosphorylation sites. For example, MFPSP resulted in highest ACC (0.7754), SP (0.7536), MCC (0.5512), AUC (0.8580) on *Aspergillus sp.* S site, with an increase of ACC in range of 4 to 16%, SP in range of 4.7 to 72.3%, MCC in range of 7 to 13.2%, AUC in range of 1.5 to 13.2%, respectively, compared with the other three methods. Of note, another strength of the MFPSP is the unbiased prediction on positive and negative phosphorylation sites, the value |SN-SP| varies in range of 0.73 to 6.56, while the compared methods are seriously biased. For instance, although NetPhosYeast achieved the best SP (0.9347) on *Aspergillus sp.* S site, the SN of this method is 0.0297, which resulted in a |SN-SP| value of 90.50%. This suggests that

**Table 3. Performance comparison of MFPSP with existing predictors on independent test data.**

| Residual type        | Fungal species         | Method        | ACC           | SN            | SP            | SN-SP %       | MCC           | AUC           |
|----------------------|------------------------|---------------|---------------|---------------|---------------|---------------|---------------|---------------|
| S                    | <i>Aspergillus sp.</i> | NetPhos       | 0.5978        | 0.2826        | 0.9130        | 63.04         | 0.2520        | 0.7257        |
|                      |                        | NetPhosYeast  | 0.6159        | 0.0297        | <b>0.9347</b> | 90.50         | 0.3010        | 0.7931        |
|                      |                        | PHOSER        | 0.7355        | 0.6304        | 0.8405        | 21.01         | 0.4817        | 0.8431        |
|                      |                        | MFPSP         | <b>0.7754</b> | <b>0.7536</b> | 0.7971        | <b>4.35</b>   | <b>0.5512</b> | <b>0.8580</b> |
|                      | <i>C. neoformans</i>   | NetPhos       | 0.6190        | 0.2777        | 0.9603        | 68.26         | 0.3257        | 0.7297        |
|                      |                        | NetPhosYeast  | 0.6865        | 0.4047        | <b>0.9682</b> | 56.35         | 0.4515        | 0.8433        |
|                      |                        | PHOSER        | 0.7777        | 0.6349        | 0.9206        | 28.57         | 0.5797        | <b>0.8938</b> |
|                      |                        | MFPSP         | <b>0.8333</b> | <b>0.8651</b> | 0.8015        | <b>6.36</b>   | <b>0.6680</b> | 0.8896        |
|                      | <i>F. graminearum</i>  | NetPhos       | 0.5765        | 0.2240        | 0.9289        | 70.49         | 0.2157        | 0.7340        |
|                      |                        | NetPhosYeast  | 0.6256        | 0.3114        | <b>0.9398</b> | 62.84         | 0.3231        | 0.7877        |
|                      |                        | PHOSER        | 0.7254        | 0.6229        | 0.8278        | 20.49         | 0.4605        | 0.8005        |
|                      |                        | MFPSP         | <b>0.8278</b> | <b>0.8607</b> | 0.7951        | <b>6.56</b>   | <b>0.6572</b> | <b>0.8859</b> |
|                      | <i>M. oryzae</i>       | NetPhos       | 0.5949        | 0.2887        | 0.9010        | 61.23         | 0.2401        | 0.6948        |
|                      |                        | NetPhosYeast  | 0.6524        | 0.3716        | <b>0.9331</b> | 56.15         | 0.3683        | 0.8021        |
|                      |                        | PHOSER        | 0.7713        | 0.7085        | 0.8342        | 12.57         | 0.5471        | 0.8447        |
|                      |                        | MFPSP         | <b>0.8316</b> | <b>0.8556</b> | 0.8074        | <b>4.82</b>   | <b>0.6639</b> | <b>0.9047</b> |
|                      | <i>N. crassa</i>       | NetPhos       | 0.5917        | 0.2510        | 0.9324        | 68.14         | 0.2507        | 0.7163        |
|                      |                        | NetPhosYeast  | 0.6582        | 0.3691        | <b>0.9472</b> | 57.81         | 0.3878        | 0.8221        |
|                      |                        | PHOSER        | 0.7215        | 0.6455        | 0.7974        | 15.19         | 0.4482        | 0.7947        |
|                      |                        | MFPSP         | <b>0.8618</b> | <b>0.8755</b> | 0.8481        | <b>2.74</b>   | <b>0.7239</b> | <b>0.9343</b> |
| <i>S. cerevisiae</i> | NetPhos                | 0.5723        | <b>0.8353</b> | 0.3093        | 52.60         | 0.1701        | 0.6425        |               |
|                      | NetPhosYeast           | 0.6397        | 0.8154        | 0.4640        | 35.14         | 0.2985        | 0.7255        |               |
|                      | PHOSER                 | 0.6961        | 0.6303        | 0.7619        | 13.16         | 0.3956        | 0.7600        |               |
|                      | ScerePhosSite          | 0.7595        | 0.7488        | <b>0.7703</b> | 2.15          | 0.5193        | <b>0.8406</b> |               |
|                      | MFPSP                  | <b>0.7614</b> | 0.7714        | 0.7514        | <b>2.00</b>   | <b>0.5229</b> | 0.8397        |               |
| <i>S. pombe</i>      | NetPhos                | 0.6067        | 0.3117        | 0.9016        | 58.99         | 0.2643        | 0.7068        |               |
|                      | NetPhosYeast           | 0.6769        | 0.4129        | <b>0.9410</b> | 52.81         | 0.4167        | 0.8124        |               |
|                      | PHOSER                 | 0.7359        | 0.6882        | 0.7837        | 9.55          | 0.4740        | 0.8137        |               |
|                      | MFPSP                  | <b>0.8062</b> | <b>0.7893</b> | 0.8230        | <b>3.37</b>   | <b>0.6127</b> | <b>0.8801</b> |               |

(Continued)

Table 3. (Continued)

| Residual type | Fungal species        | Method        | ACC           | SN            | SP            | SN-SP %       | MCC           | AUC           |
|---------------|-----------------------|---------------|---------------|---------------|---------------|---------------|---------------|---------------|
| T             | <i>F. graminearum</i> | NetPhos       | 0.6041        | 0.4166        | 0.7916        | 37.5          | 0.2247        | 0.6401        |
|               |                       | NetPhosYeast  | 0.6583        | 0.6666        | 0.6500        | <b>1.66</b>   | 0.3167        | 0.7268        |
|               |                       | PHOSER        | 0.6375        | 0.4833        | <b>0.7916</b> | 30.83         | 0.2890        | 0.7187        |
|               |                       | MFPSP         | <b>0.7542</b> | <b>0.7333</b> | 0.7750        | 4.17          | <b>0.5088</b> | <b>0.8137</b> |
|               | <i>M. oryzae</i>      | NetPhos       | 0.5444        | 0.3888        | 0.7000        | 31.12         | 0.0935        | 0.5746        |
|               |                       | NetPhosYeast  | 0.6500        | 0.7333        | 0.5666        | 16.67         | 0.3042        | 0.7044        |
|               |                       | PHOSER        | 0.7333        | 0.5555        | <b>0.9111</b> | 35.56         | 0.4992        | 0.8019        |
|               |                       | MFPSP         | <b>0.8167</b> | <b>0.8333</b> | 0.8000        | <b>3.33</b>   | <b>0.6337</b> | <b>0.8528</b> |
|               | <i>N. crassa</i>      | NetPhos       | 0.5954        | 0.3919        | <b>0.7989</b> | 40.7          | 0.2090        | 0.6767        |
|               |                       | NetPhosYeast  | 0.6884        | 0.6783        | 0.6984        | <b>2.01</b>   | 0.3769        | 0.7510        |
|               |                       | PHOSER        | 0.6256        | 0.4572        | 0.7939        | 33.67         | 0.2668        | 0.7199        |
|               |                       | MFPSP         | <b>0.8015</b> | <b>0.8141</b> | 0.7889        | 2.52          | <b>0.6032</b> | <b>0.9055</b> |
|               | <i>S. cerevisiae</i>  | NetPhos       | 0.5694        | 0.6686        | 0.4701        | 19.85         | 0.1416        | 0.5869        |
|               |                       | NetPhosYeast  | 0.6382        | 0.4609        | <b>0.8156</b> | 35.47         | 0.2958        | 0.7039        |
|               |                       | PHOSER        | 0.6909        | 0.6980        | 0.6838        | 1.42          | 0.3820        | 0.7423        |
|               |                       | ScerePhosSite | <b>0.7573</b> | <b>0.7507</b> | <b>0.7639</b> | 1.32          | <b>0.5147</b> | <b>0.8269</b> |
|               |                       | MFPSP         | 0.7426        | 0.7477        | 0.7376        | 1.01          | 0.4853        | 0.8105        |
|               | <i>S. pombe</i>       | NetPhos       | 0.5755        | 0.3953        | 0.7558        | 36.05         | 0.1620        | 0.6074        |
|               |                       | NetPhosYeast  | 0.6744        | <b>0.8023</b> | 0.5465        | 25.58         | 0.3608        | 0.7337        |
|               |                       | PHOSER        | 0.7034        | 0.5930        | <b>0.8139</b> | 22.09         | 0.4172        | 0.7743        |
| MFPSP         |                       | <b>0.7849</b> | 0.7674        | 0.8023        | <b>3.49</b>   | <b>0.5701</b> | <b>0.8327</b> |               |
| Y             | <i>S. cerevisiae</i>  | NetPhos       | 0.5274        | 0.5274        | 0.5274        | <b>0.00</b>   | 0.0549        | 0.5477        |
|               |                       | PHOSER        | 0.5769        | 0.5714        | 0.5824        | 1.10          | 0.1538        | 0.6106        |
|               |                       | ScerePhosSite | 0.6630        | 0.6700        | 0.6556        | 1.44          | 0.3260        | 0.7451        |
|               |                       | MFPSP         | <b>0.7106</b> | <b>0.7070</b> | <b>0.7143</b> | 0.73          | <b>0.4213</b> | <b>0.7525</b> |

<https://doi.org/10.1371/journal.pcbi.1012607.t003>

NetPhosYeast predicts almost all query sequences as non-phosphorylation site. Opposite prediction bias can also be observed, such as NetPhos for *S. cerevisiae* S site with a |SN-SP| value of 52.60%, where the prediction result is seriously skewed to be phosphorylatable. Collectively, these results demonstrate that MFPSP is significantly superior than the existing methods for fungi phosphorylation site identification.

## Conclusion

In this study, a novel tool called MFPSP was developed for phosphorylation site prediction in multi-fungal species. The sequence information was extracted by physicochemical features and distributed information, furthermore, an offspring competition-based genetic algorithm was applied for selecting the optimal feature subset. Independent testing demonstrated that our proposed model achieves a more advanced and balanced performance as compared to several state-of-the-art available toolkits. Feature intersection, contribution and patterns were interpreted. The minus of MFPSP is that the sequence information is mainly based on sequence physicochemical and embedding features, exploring more advanced features will further elevate the performance and broaden the applications, for example, encoding sequences into images using chaos game representation [45] and Hilbert curve [46], extracting structure information by graph neural network [47–49], as well as 3D-structure information and large language models [50–52]. We anticipate MFPSP will supplement hands-on experiments by

pre-screening potential phosphorylation sites and enhances our functional understanding of phosphorylation modification in fungi.

## Supporting information

**S1 Methods. *Physicochemical features methods.***

(DOCX)

**S1 Table. Descriptor parameter search range and the best values.**

(DOCX)

**S2 Table. Hyperparameters search range for the four traditional classifiers.**

(DOCX)

**S3 Table. Thirteen types of physicochemical properties that used for computing the features of CTDC.**

(DOCX)

**S4 Table. Optimal parameters  $k$  and  $w$  for different species.**

(DOCX)

**S5 Table. Features and algorithms used in three compared methods.**

(DOCX)

**S1 Fig. Feature intersection of S phosphorylation among five fungi species.**

(DOCX)

**S2 Fig. SHAP dependence plots.**

(DOCX)

## Author Contributions

**Conceptualization:** Chao Wang, Quan Zou.

**Data curation:** Chao Wang.

**Formal analysis:** Chao Wang.

**Funding acquisition:** Chao Wang.

**Investigation:** Chao Wang, Quan Zou.

**Methodology:** Chao Wang.

**Project administration:** Quan Zou.

**Resources:** Chao Wang.

**Software:** Chao Wang.

**Supervision:** Quan Zou.

**Validation:** Chao Wang.

**Visualization:** Chao Wang.

**Writing – original draft:** Chao Wang, Quan Zou.

**Writing – review & editing:** Chao Wang, Quan Zou.

## References

1. Wang DL, Zeng S, Xu CH, Qiu WR, Liang YC, Joshi T, et al. MusiteDeep: a deep-learning framework for general and kinase-specific phosphorylation site prediction. *Bioinformatics*. 2017; 33(24):3909–16. <https://doi.org/10.1093/bioinformatics/btx496> PMID: 29036382.
2. Vieitez C, Busby BP, Ochoa D, Mateus A, Memon D, Galardini M, et al. High-throughput functional characterization of protein phosphorylation sites in yeast. *Nature Biotechnology*. 2022; 40(3):382–90. <https://doi.org/10.1038/s41587-021-01051-x> PMID: 34663920.
3. Walsh C. *Posttranslational modification of proteins: expanding nature's inventory*. Greenwood Village, CO, USA: Roberts and Company Publishers; 2006.
4. Hornbeck PV, Zhang B, Murray B, Kornhauser JM, Latham V, Skrzypek E. PhosphoSitePlus, 2014: mutations, PTMs and recalibrations. *Nucleic Acids Research*. 2015; 43(D1):D512–D20. <https://doi.org/10.1093/nar/gku1267> PMID: 25514926.
5. Cohen PTW. Protein phosphatase 1-targeted in many directions. *Journal of Cell Science*. 2002; 115(2):241–56. <https://doi.org/10.1242/jcs.115.2.241> PMID: 11839776.
6. Ma L, Li X, Xing F, Ma J, Ma X, Jiang Y. Fus3, as a critical kinase in MAPK cascade, regulates aflatoxin biosynthesis by controlling the substrate supply in *Aspergillus flavus*, rather than the cluster genes modulation. *Microbiology Spectrum*. 2022; 10(1):e01269–21. <https://doi.org/10.1128/spectrum.01269-21> PMID: 35107358.
7. Cao C, Wang K, Wang Y, Liu T-B, Rivera A, Xue C. Ubiquitin proteolysis of a CDK-related kinase regulates titan cell formation and virulence in the fungal pathogen *Cryptococcus neoformans*. *Nature Communications*. 2022; 13(1):6397. <https://doi.org/10.1038/s41467-022-34151-6> PMID: 36302775.
8. Gong C, Huang J, Sun D, Xu D, Guo Y, Kang J, et al. FgSfl1 and its conserved PKA phosphorylation sites are important for conidiation, sexual reproduction, and pathogenesis in *Fusarium graminearum*. *Journal of Fungi*. 2021; 7(9):755. <https://doi.org/10.3390/jof7090755> PMID: 34575793.
9. Hnatowich DJ, Layne WW, Childs RL, Lanteigne D, Davis MA, Griffin TW, et al. Radioactive labeling of antibody: a simple and efficient method. *Science (New York, NY)*. 1983; 220(4597):613–5. <https://doi.org/10.1126/science.6836304> PMID: 6836304.
10. Domon B, Aebersold R. Mass spectrometry and protein analysis. *Science*. 2006; 312(5771):212–7. <https://doi.org/10.1126/science.1124619> PMID: 16614208.
11. Collas P. The Current State of Chromatin Immunoprecipitation. *Molecular Biotechnology*. 2010; 45(1):87–100. <https://doi.org/10.1007/s12033-009-9239-8> PMID: 20077036.
12. Luo FL, Wang MH, Liu Y, Zhao XM, Li A. DeepPhos: prediction of protein phosphorylation sites with deep learning. *Bioinformatics*. 2019; 35(16):2766–73. <https://doi.org/10.1093/bioinformatics/bty1051> PMID: 30601936.
13. Peng B, Gao D, Wang M, Zhang Y. 3D-STCNN: Spatiotemporal Convolutional Neural Network based on EEG 3D features for detecting driving fatigue. *Journal of Data Science and Intelligent Systems*. 2024; 2(1). <https://doi.org/10.47852/bonviewJDSIS3202983>
14. Wang J, Yue K, Duan L. Models and techniques for domain relation extraction: a survey. *Journal of Data Science and Intelligent Systems*. 2023; 1(2):65–82. <https://doi.org/10.47852/bonviewJDSIS3202973>
15. Dou L, Yang F, Xu L, Zou Q. A comprehensive review of the imbalance classification of protein post-translational modifications. *Briefings in Bioinformatics*. 2021; 22(5):bbab089. <https://doi.org/10.1093/bib/bbab089> PMID: 33834199.
16. Cao M, Chen G, Yu J, Shi S. Computational prediction and analysis of species-specific fungi phosphorylation via feature optimization strategy. *Briefings in Bioinformatics*. 2020; 21(2):595–608. <https://doi.org/10.1093/bib/bby122> PMID: 30590490.
17. Bai YH, Chen B, Li MZ, Zhou YC, Ren SL, Xu Q, et al. FPD: A comprehensive phosphorylation database in fungi. *Fungal Biology*. 2017; 121(10):869–75. <https://doi.org/10.1016/j.funbio.2017.06.004> PMID: 28889911.
18. Wang C, Yang Q. ScerePhoSite: An interpretable method for identifying fungal phosphorylation sites in proteins using sequence-based features. *Computers in Biology and Medicine*. 2023; 158:106798. <https://doi.org/10.1016/j.compbiomed.2023.106798> PMID: 36966555.
19. He W, Jia C, Zou Q. 4mCPred: machine learning methods for DNA N4-methylcytosine sites prediction. *Bioinformatics*. 2019; 35(4):593–601. <https://doi.org/10.1093/bioinformatics/bty668> PMID: 30052767.
20. Tsukiyama S, Hasan MM, Deng H-W, Kurata H. BERT6mA: prediction of DNA N6-methyladenine site using deep learning-based approaches. *Briefings in Bioinformatics*. 2022; 23(2):bbac053. <https://doi.org/10.1093/bib/bbac053> PMID: 35225328.

21. Wang C, Ju Y, Zou Q, Lin C. DeepAc4C: a convolutional neural network model with hybrid features composed of physicochemical patterns and distributed representation information for identification of N4-acetylcytidine in mRNA. *Bioinformatics*. 2022; 38(1):52–7. <https://doi.org/10.1093/bioinformatics/btab611> PMID: 34427581.
22. Wang C, Zou Q. Prediction of protein solubility based on sequence physicochemical patterns and distributed representation information with DeepSoluE. *BMC Biology*. 2023; 21(1). <https://doi.org/10.1186/s12915-023-01510-8> PMID: 36694239.
23. Zou Q, Xing PW, Wei LY, Liu B. Gene2vec: gene subsequence embedding for prediction of mammalian N-6-methyladenosine sites from mRNA. *RNA*. 2019; 25(2):205–18. <https://doi.org/10.1261/rna.069112.118> PMID: 30425123.
24. Chaabane M, Williams RM, Stephens AT, Park JW. circDeep: deep learning approach for circular RNA classification from other long non-coding RNA. *Bioinformatics*. 2020; 36(1):73–80. <https://doi.org/10.1093/bioinformatics/btz537> PMID: 31268128.
25. Ren RH, Yin CC, Yau SST. Kmer2vec: A novel method for comparing DNA sequences by word2vec embedding. *Journal of Computational Biology*. 2022; 29(9):1001–21. <https://doi.org/10.1089/cmb.2021.0536> PMID: 35593919.
26. Asim MN, Malik MI, Dengel A, Ahmed S, editors. K-mer neural embedding performance analysis using amino acid codons. 2020 International Joint Conference on Neural Networks (IJCNN); 2020: IEEE.
27. Tsukiyama S, Hasan MM, Fujii S, Kurata H. LSTM-PHV: prediction of human-virus protein–protein interactions by LSTM with word2vec. *Briefings in Bioinformatics*. 2021; 22(6):bbab228. <https://doi.org/10.1093/bib/bbab228> PMID: 34160596.
28. Ozger ZB. A robust protein language model for SARS-CoV-2 protein–protein interaction network prediction. *Artificial Intelligence in Medicine*. 2023; 142:102574. <https://doi.org/10.1016/j.artmed.2023.102574> PMID: 37316102
29. Iuchi H, Matsutani T, Yamada K, Iwano N, Sumi S, Hosoda S, et al. Representation learning applications in biological sequence analysis. *Computational and Structural Biotechnology Journal*. 2021; 19:3198–208. <https://doi.org/10.1016/j.csbj.2021.05.039> PMID: 34141139
30. Zhang Y, Zhang P, Wu H. Enhancer-MDLF: a novel deep learning framework for identifying cell-specific enhancers. *Briefings in Bioinformatics*. 2024; 25(2):bbae083. <https://doi.org/10.1093/bib/bbae083> PMID: 38485768.
31. Koza JR. Genetic programming as a means for programming computers by natural selection. *Statistics and Computing*. 1994; 4:87–112. <https://doi.org/10.1007/BF00175355>
32. Wang C, Wang P, Han S, Wang L, Zhao Y, Juan L. FunEffector-Pred: identification of fungi effector by activate learning and genetic algorithm sampling of imbalanced data. *IEEE Access*. 2020; 8:57674–83. <https://doi.org/10.1109/ACCESS.2020.2982410>
33. Wang C, Wu J, Xu L, Zou Q. NonClasGP-Pred: robust and efficient prediction of non-classically secreted proteins by integrating subset-specific optimal models of imbalanced data. *Microbial Genomics*. 2020; 6(12). <https://doi.org/10.1099/mgen.0.000483> PMID: 33245691.
34. He S, Guo F, Zou Q. MRMD2. 0: a python tool for machine learning with feature ranking and reduction. *Current Bioinformatics*. 2020; 15(10):1213–21. <https://doi.org/10.2174/1574893615999200503030350>
35. Lundberg SM, Lee S-I. A unified approach to interpreting model predictions. *Advances in Neural Information Processing Systems*. 2017; 30.
36. Zhang P, Zhang H, Wu H. iPro-WAEL: a comprehensive and robust framework for identifying promoters in multiple species. *Nucleic Acids Research*. 2022; 50(18):10278–89. <https://doi.org/10.1093/nar/gkac824> PMID: 36161334.
37. Liu H, Li D, Wu H. Lnclocator-imb: An imbalance-tolerant ensemble deep learning framework for predicting long non-coding RNA subcellular localization. *IEEE Journal of Biomedical and Health Informatics*. 2023. <https://doi.org/10.1109/JBHI.2023.3324709> PMID: 37843994.
38. Chen Z, Zhao P, Li F, Marquez-Lago TT, Leier A, Revote J, et al. iLearn: an integrated platform and meta-learner for feature engineering, machine-learning analysis and modeling of DNA, RNA and protein sequence data. *Briefings in bioinformatics*. 2020; 21(3):1047–57. <https://doi.org/10.1093/bib/bbz041> PMID: 31067315.
39. Iakoucheva LM, Radivojac P, Brown CJ, O'Connor TR, Sikes JG, Obradovic Z, et al. The importance of intrinsic disorder for protein phosphorylation. *Nucleic acids research*. 2004; 32(3):1037–49. <https://doi.org/10.1093/nar/gkh253> PMID: 14960716.
40. Frödin M, Antal TL, Dümmler BA, Jensen CJ, Deak M, Gammeltoft S, et al. A phosphoserine/threonine-binding pocket in AGC kinases and PDK1 mediates activation by hydrophobic motif phosphorylation. *The EMBO journal*. 2002. <https://doi.org/10.1093/emboj/cdf551> PMID: 12374740.

41. Rieloff E, Skepö M. The effect of multisite phosphorylation on the conformational properties of intrinsically disordered proteins. *International Journal of Molecular Sciences*. 2021; 22(20):11058. <https://doi.org/10.3390/ijms222011058> PMID: 34681718.
42. Blom N, Sicheritz-Pontén T, Gupta R, Gammeltoft S, Brunak S. Prediction of post-translational glycosylation and phosphorylation of proteins from the amino acid sequence. *Proteomics*. 2004; 4(6):1633–49. <https://doi.org/10.1002/pmic.200300771> PMID: 15174133.
43. Ingrell CR, Miller ML, Jensen ON, Blom N. NetPhosYeast: prediction of protein phosphorylation sites in yeast. *Bioinformatics*. 2007; 23(7):895–7. <https://doi.org/10.1093/bioinformatics/btm020> PMID: 17282998.
44. Trost B, Kusalik A. Computational phosphorylation site prediction in plants using random forests and organism-specific instance weights. *Bioinformatics*. 2013; 29(6):686–94. <https://doi.org/10.1093/bioinformatics/btt031> PMID: 23341503.
45. Löchel HF, Eger D, Sperlea T, Heider D. Deep learning on chaos game representation for proteins. *Bioinformatics*. 2020; 36(1):272–9. <https://doi.org/10.1093/bioinformatics/btz493> PMID: 31225868.
46. Anjum MM, Tahmid IA, Rahman MS. CNN model with Hilbert curve representation of DNA sequence for enhancer prediction. *BioRxiv*. 2019: 552141. <https://doi.org/10.1101/552141>
47. Yan Y, Jiang J-Y, Fu M, Wang D, Pelletier AR, Sigdel D, et al. MIND-S is a deep-learning prediction model for elucidating protein post-translational modifications in human diseases. *Cell Reports Methods*. 2023; 3(3). <https://doi.org/10.1016/j.crmeth.2023.100430> PMID: 37056379.
48. Zhang P, Wu Y, Zhou H, Zhou B, Zhang H, Wu H. CLNN-loop: a deep learning model to predict CTCF-mediated chromatin loops in the different cell lines and CTCF-binding sites (CBS) pair types. *Bioinformatics*. 2022; 38(19):4497–504. <https://doi.org/10.1093/bioinformatics/btac575> PMID: 35997565.
49. Zhang P, Wu H. Ichrom-deep: an attention-based deep learning model for identifying chromatin interactions. *IEEE Journal of Biomedical and Health Informatics*. 2023. <https://doi.org/10.1109/JBHI.2023.3292299> PMID: 37402191.
50. Bryant P, Pozzati G, Elofsson A. Improved prediction of protein-protein interactions using AlphaFold2. *Nature Communications*. 2022; 13(1):1265. <https://doi.org/10.1038/s41467-022-28865-w> PMID: 35273146.
51. Rao RM, Liu J, Verkuil R, Meier J, Canny J, Abbeel P, et al., editors. MSA transformer. *International Conference on Machine Learning*; 2021: PMLR.
52. Wang Y, Zhai Y, Ding Y, Zou Q. SBSM-Pro: support bio-sequence machine for proteins. *Science China Information Sciences*. 2024; 67(11):212106. <https://doi.org/10.1007/s11432-024-4171-9>
